# Supplementary material for: Enhanced photovoltage and stability of perovskite photovoltaics enabled by a cyclohexylmethylammonium iodide-based 2D perovskite passivation layer
Source: Royal Society of Chemistry journal article supplement (doi:10.1039/d1nr03624f), 2021-01-01
Supplement: d1nr03624f1.pdf [file d1nr03624f1.pdf]

# Supporting Information for

## Enhanced Photovoltage and Stability of Perovskite Photovoltaics Enabled by Cyclohexylmethylammonium Iodide-Based 2D Perovskite Passivation Layer

Weihai Sun<sup>a,\*</sup>, Jinjun Zou<sup>a,†</sup>, Xiaobing Wang<sup>a</sup>, Shibo Wang<sup>a</sup>, Yitian Du<sup>a</sup>, Fengxian Cao<sup>a</sup>, Zhang Lan<sup>a</sup>, Jihuai Wu<sup>a,\*</sup>, Peng Gao<sup>b</sup>

<sup>a</sup> *Engineering Research Center of Environment-Friendly Functional Materials, Ministry of Education; Fujian Engineering Research Center of Green Functional Materials; Institute of Materials Physical Chemistry, Huaqiao University, Xiamen 361021, China*  
<sup>b</sup> *Fujian Institute of Research on Structure Matter, CAS, Xiamen 361021, Fujian, China*

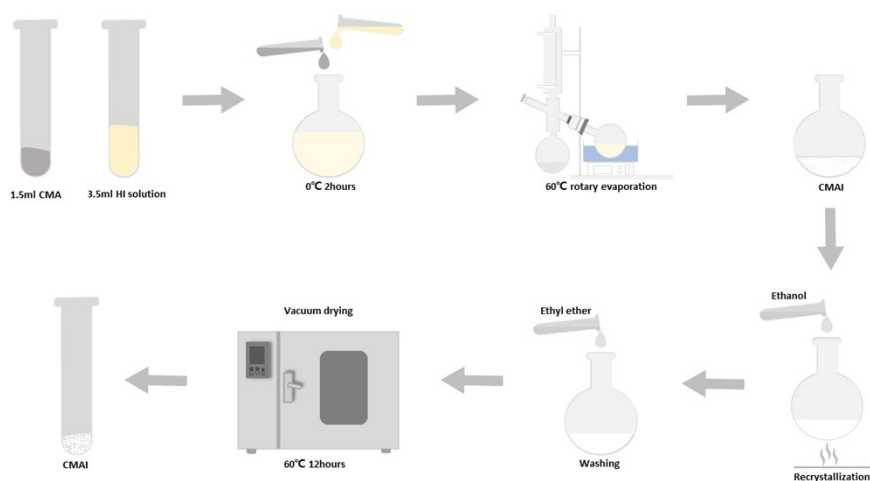

**Fig. S1** Schematic illustration of the synthesis of CMAI.

\* E-mail: [sunweihai@hqu.edu.cn](mailto:sunweihai@hqu.edu.cn); [jhwu@hqu.edu.cn](mailto:jhwu@hqu.edu.cn).

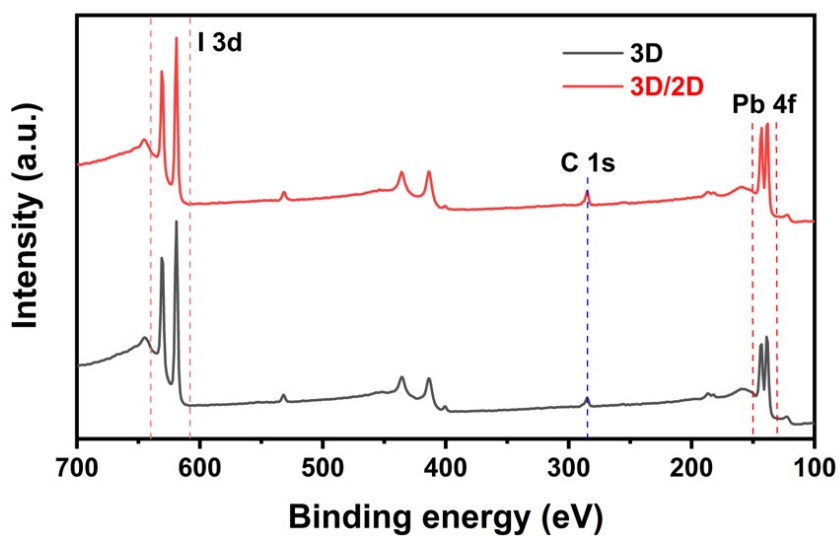

**Fig. S2** XPS survey spectra of the perovskite films with and without CMAI treatment.

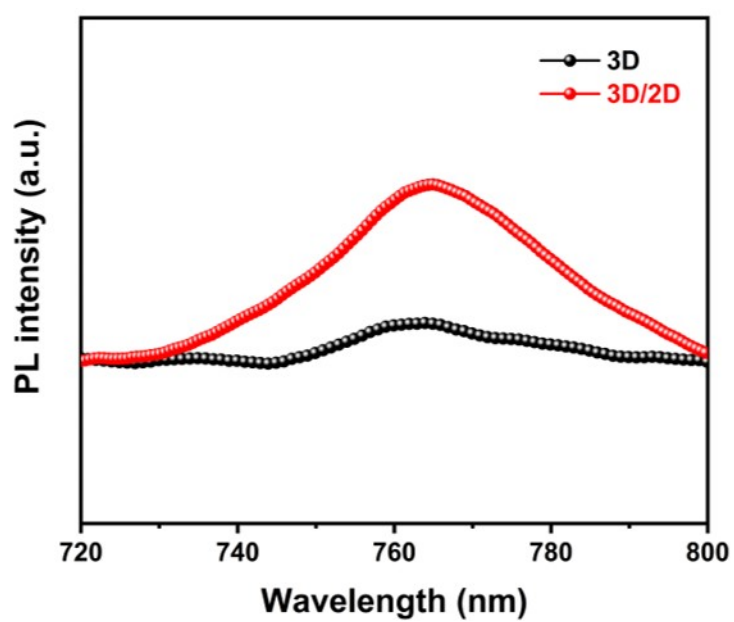

**Fig. S3** PL spectra of different perovskite films covered with HTL.

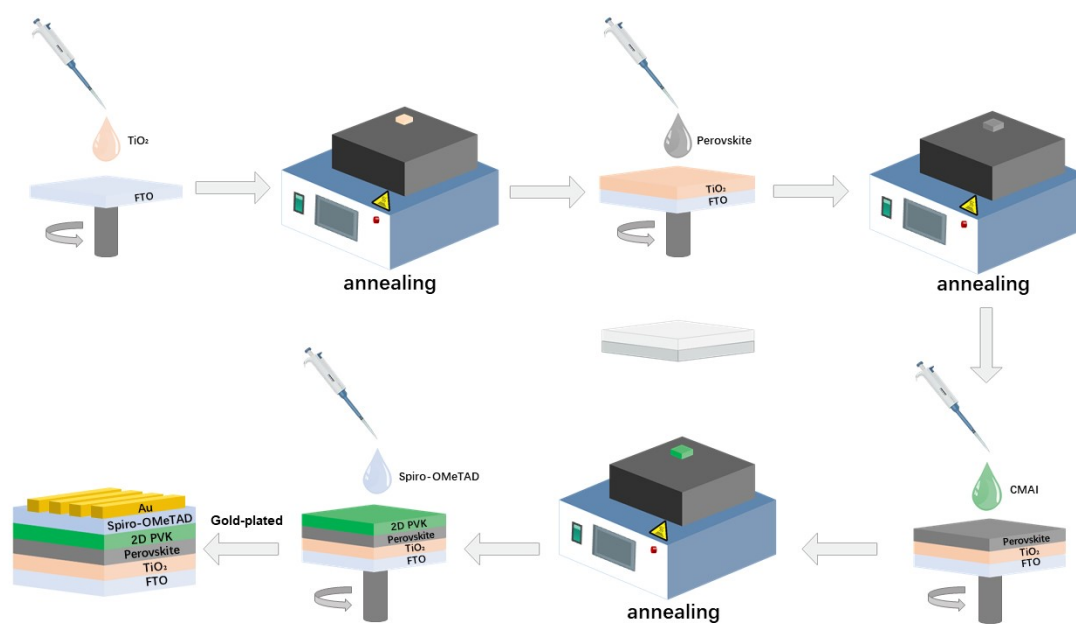

**Fig. S4** Schematic illustration of the fabrication of CMAI-treated PSCs.

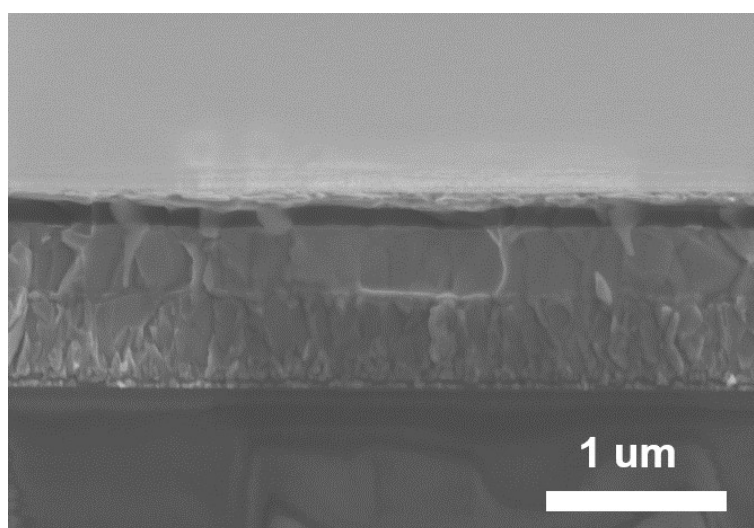

**Fig. S5** Cross-sectional SEM image of the 3D device.

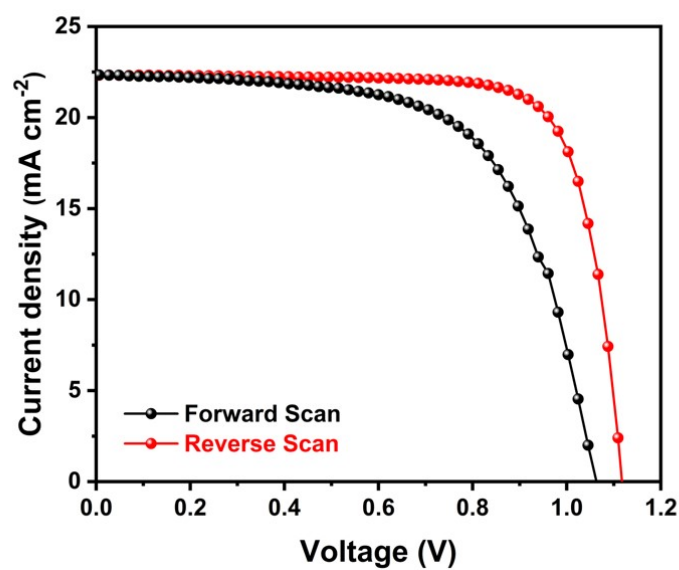

**Fig. S6**  $J$ - $V$  curves of the 3D device under both forward and reverse scans.

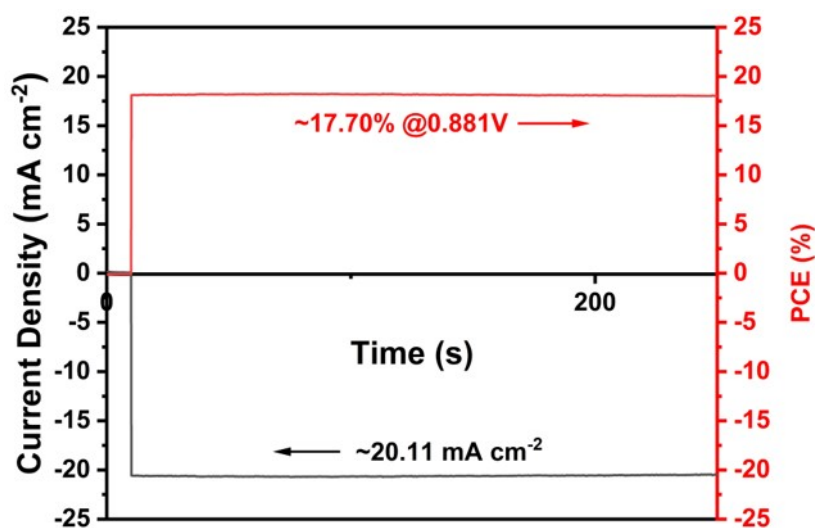

**Fig. S7** The output of current densities and corresponding efficiencies of the pristine device by holding the voltage at 0.88 V.

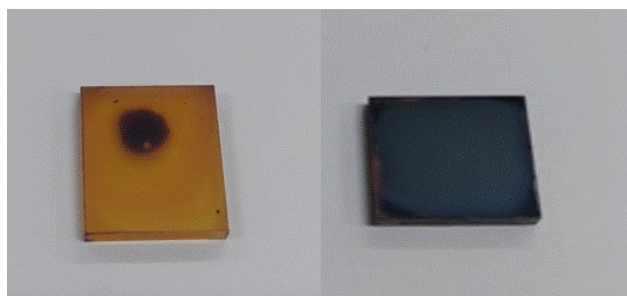

**Fig. S8** Photographs of 3D perovskite film (left) and 3D/2D perovskite film (right) after 35 days storage.

**Table S1.** TRPL data of 3D and 3D/2D perovskite films on FTO substrates.

| samples | $\tau_{\text{ave}}$ (ns) | $A_1$ (%) | $\tau_1$ (ns) | $A_2$ (%) | $\tau_2$ (ns) |
|---------|--------------------------|-----------|---------------|-----------|---------------|
| 3D      | 68.88                    | 20.67     | 9.84          | 79.33     | 84.27         |
| 3D/2D   | 88.10                    | 11.22     | 13.16         | 88.78     | 97.57         |

**Table S2.** Photovoltaic data of 3D and 3D/2D PSCs with different scan direction.

| Device | Scan direction | $V_{\text{OC}}$ (V) | $J_{\text{SC}}$ (mA cm <sup>-2</sup> ) | FF   | PCE (%) | HI (%) |
|--------|----------------|---------------------|----------------------------------------|------|---------|--------|
| 3D     | Reverse        | 1.12                | 22.33                                  | 0.77 | 19.26   | 21.60  |
|        | Forward        | 1.06                | 22.26                                  | 0.64 | 15.10   |        |
| 3D/2D  | Reverse        | 1.19                | 23.18                                  | 0.80 | 22.06   | 4.99   |
|        | Forward        | 1.16                | 23.17                                  | 0.78 | 20.96   |        |
